# Supplementary material
Source: publisher site journal article supplement (https://www.dovepress.com/article/434829)
Supplement: Supplementary file 1 [file get_supplementary_file.php]

# Correctness and completeness of breast cancer diagnoses recorded in UK CPRD Aurum and CPRD GOLD databases: comparison to Hospital Episode Statistics and Cancer Registry

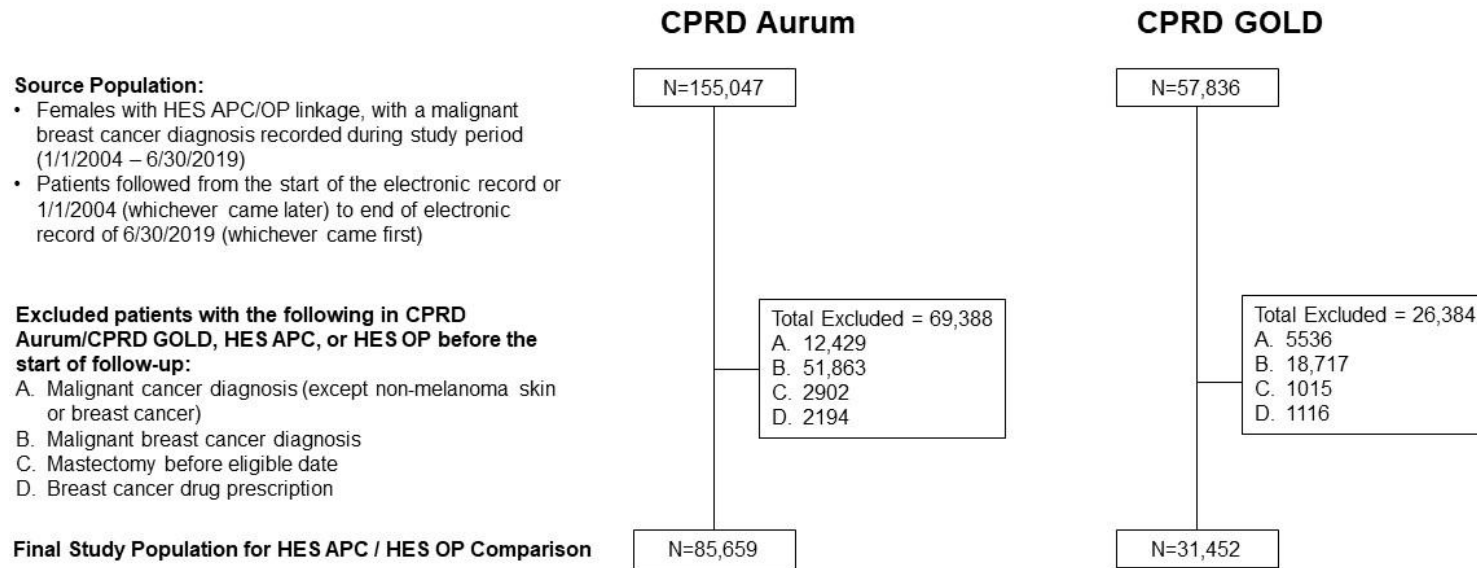

Abbreviations: APC, Admitted Patient Care; CPRD, Clinical Practice Research Datalink; HES, Hospital Episode Statistics; OP, Outpatient

Supplementary Figure 1. Study Population Selection for HES APC / HES OP Comparison

**Source Population:**

- Females with Cancer Registry linkage, with a malignant breast cancer diagnosis recorded during study period (1/1/2004 – 12/31/2016)
- Patients followed from the start of the electronic record or 1/1/2004 (whichever came later) to end of electronic record of 6/30/2016 (whichever came first)

**Excluded patients with the following in CPRD Aurum/CPRD GOLD or the Cancer Registry before the start of follow-up:**

- A. Malignant cancer diagnosis (except non-melanoma skin or breast cancer)
- B. Malignant breast cancer diagnosis
- C. Mastectomy before eligible date
- D. Breast cancer drug prescription

**Final Study Population for Cancer Registry Comparison**

**CPRD Aurum**

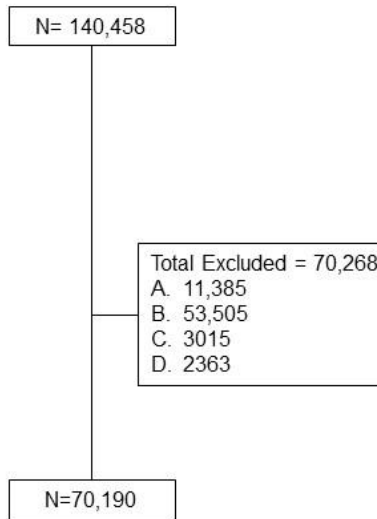

**CPRD GOLD**

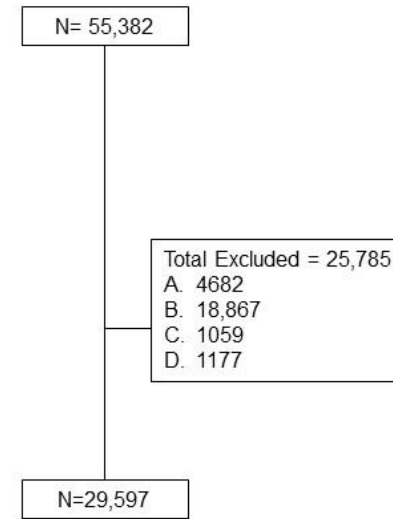

Abbreviations: Clinical Practice Research Datalink

Supplementary Figure 2. Study Population Selection for the Cancer Registry Comparison
